# Supplementary material for: Extrinsic Regulators of mRNA Translation in Developing Brain: Story of WNTs
Source: MDPI journal article supplement (doi:10.3390/cells10020253), 2021-01-28
Supplement: s1 [file s1]

# Supplementary Figures:

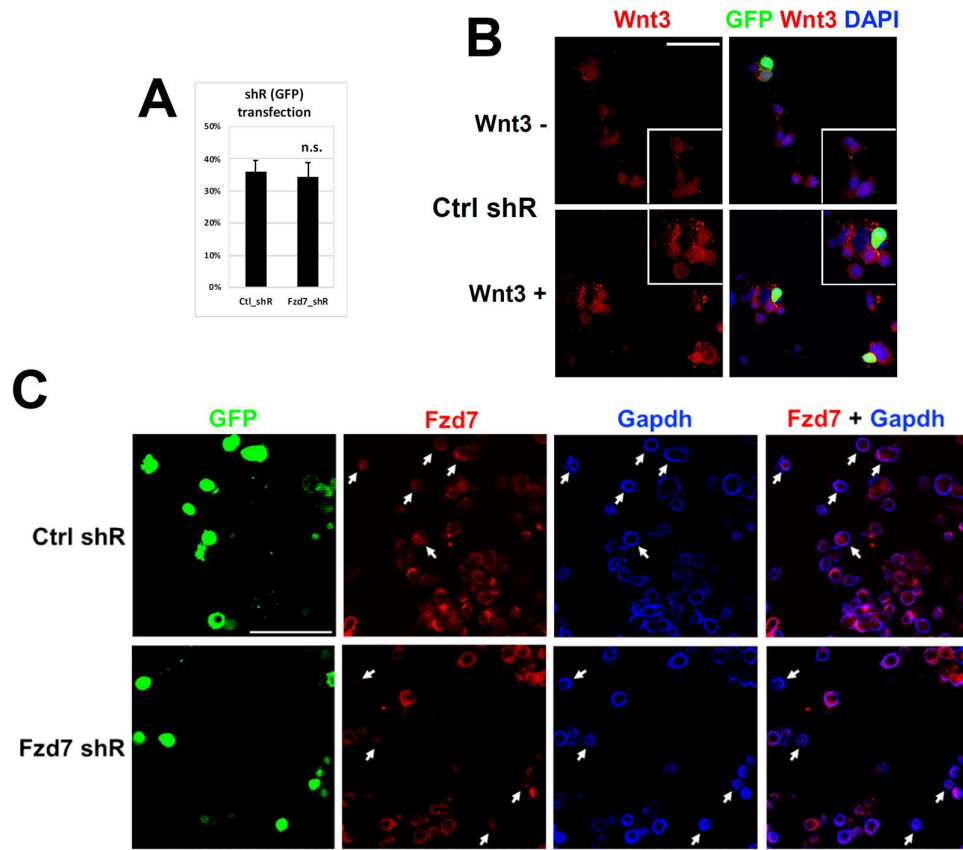

**Figure S1.** (A). Transfection efficiency of shRNA plasmids into N2a cells with counting GFP-transfected cells ( $n = 19 \sim 26$  repeat percentages with total 2,099 ~ 2,243 GFP cells). Data represent the mean and SEM. n.s.: not significant. (B). IHC for Wnt3 (red), GFP (green), and DAPI (blue) in N2a cells after 3 days of *Ctrl* shRNA transfection containing GFP marker and following 4 hours of either Wnt3- (mock: nothing added) or Wnt3+ (100 ng/ml) treatment ( $n = 3$  separate transfections). Insert: higher magnification image; scale bar: 100  $\mu$ m. (C). IHC for GFP (green), Fzd7 (red), and Gapdh (blue) in N2a cells after 3 days of each shRNA transfection containing GFP marker (*Ctrl* or *Fzd7* shRNA) and following 4 hours of Wnt3 (100 ng/ml) treatment ( $n = 3$  separate transfections). Arrow: shRNA-transfected GFP cells; scale bar: 100  $\mu$ m.

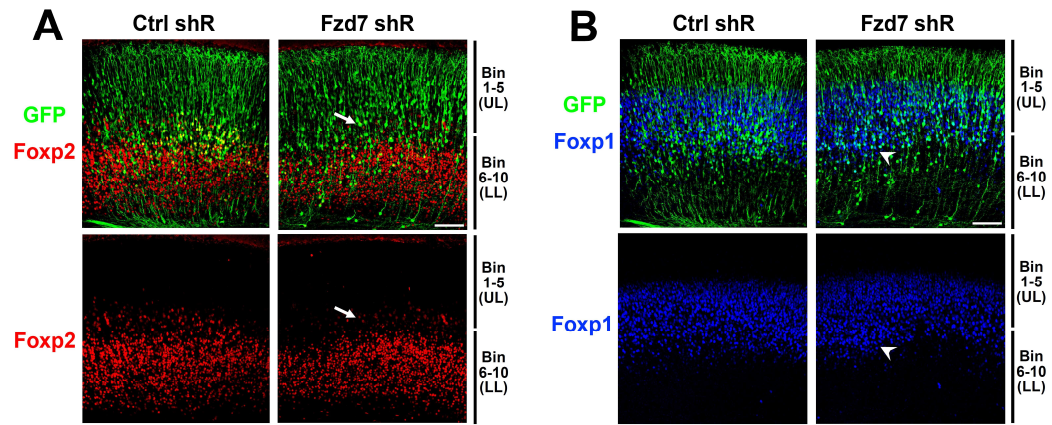

**Figure S2.** (A)–(B). IHC for GFP (green), Foxp2 (red in A), and Foxp1 (blue in B) in P0 neocortices electroporated *in utero* with *Ctrl* or *Fzd7* shRNA at E13 ( $n = 3$  animals). Arrow and arrowhead: the areas showing bigger change in Foxp2 and Foxp1 expression, respectively; Bin 1-5: upper layers (UL); Bin 6–10: lower layers (LL); scale bar: 100 μm.

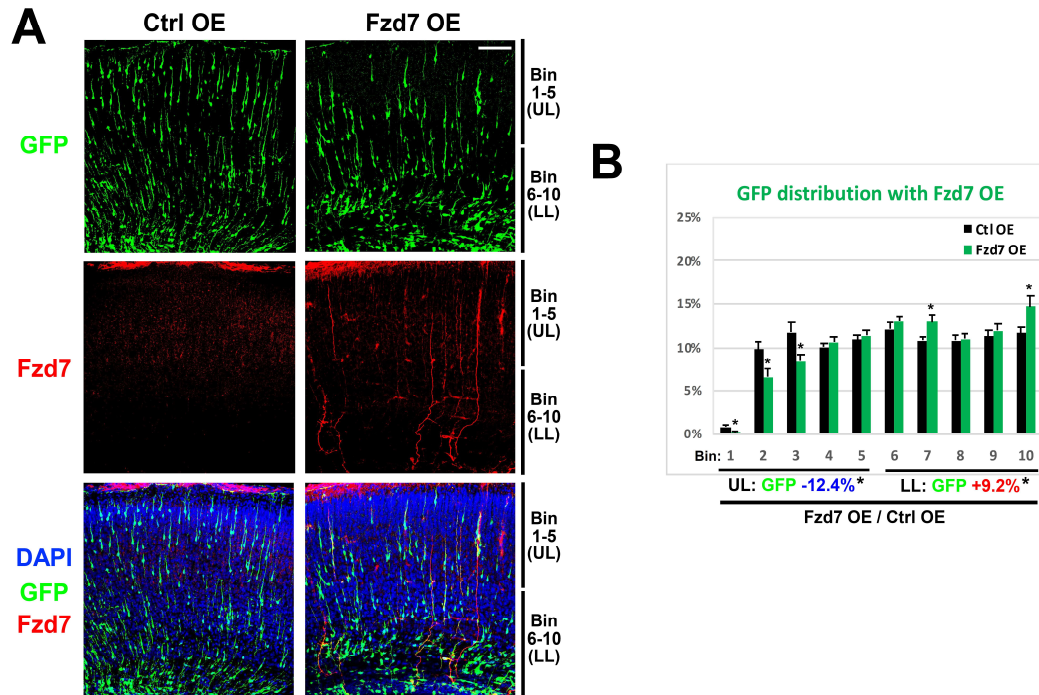

**Figure S3. (A).** IHC for GFP cells (green) with Fzd7 (red) immunostaining in P0 neocortices electroporated *in utero* with *Ctrl* or *Fzd7* OE at E16 ( $n = 3$  animals). DAPI shown in blue; Bin 1–5: upper layers (UL); Bin 6–10: lower layers (LL); scale bar: 100  $\mu$ m. **(B).** Percentage (%) of GFP+ cells in each bin from total 10 bins ( $n = 21 \sim 25$  pictures counted with total  $\sim 4,000$  GFP cells). GFP+ cells in the upper layers (Bin 1–5) of *Fzd7* OE neocortices decreased by 12.4% compared to *Ctrl* OE, while increase of 9.2% was shown in the lower layers (Bin 6–10). Data represent the mean and SEM. \*:  $p < 0.05$ .

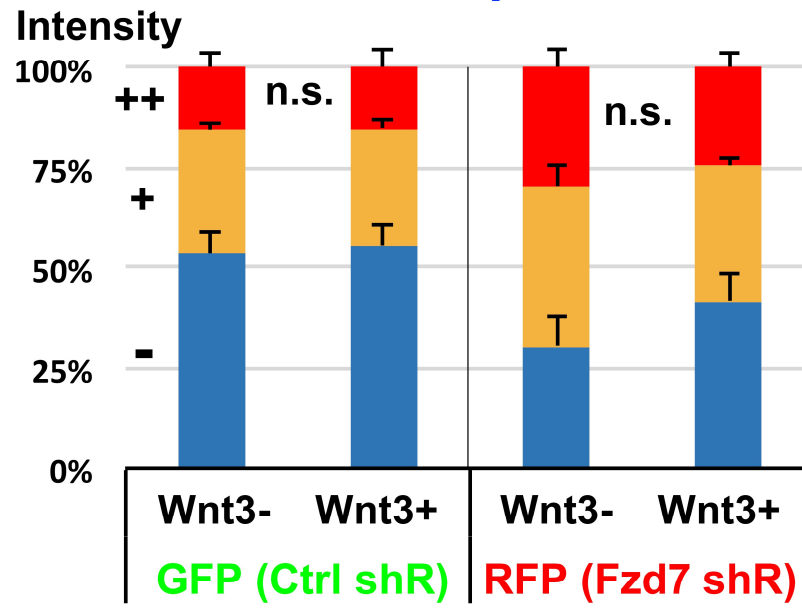

**Figure S4.** Quantification of Foxp1 signal in GFP (*Ctrl* shRNA) and RFP (*Fzd7* shRNA) cells with 48 hours treatment of Wnt3- or + (100 ng/ml) after six days *in vitro* (DIV) cultures of primary neuronal cells *in utero* electroporated (IUE) at E13 ( $n = 3$  animals). The -, +, and ++ intensities were normalized to the intensity observed in non-transfected cell as an intrinsic control of immunostaining quality ( $n = 20 \sim 32$  pictures counted with total 297 ~ 490 cells). Data represent the mean and SEM. n.s.: not significant.
